# Supplementary material for: Modulation of DNA Methylation/Demethylation Reactions Induced by Nutraceuticals and Pollutants of Exposome Can Promote a C > T Mutation in the Breast Cancer Predisposing Gene PALB2
Source: MDPI journal article supplement (doi:10.3390/epigenomes6040032), 2022-09-30
Supplement: s1 [file s1]

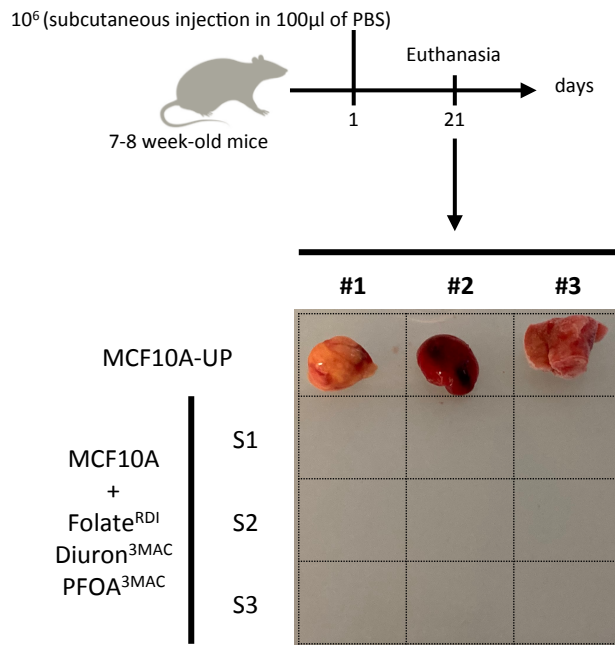

## Supplementary Figure S1.

Three mice were injected with three batches of MCF10A cells exposed to Folate<sup>RDI</sup>/Diuron<sup>3MAC</sup>/PFOA<sup>3MAC</sup> (S1, S2 and S3). After 21 days, mice were euthanized and the tumors resected. The injection of MCF10A-UP cells is used here as a positive control for mammary tumorigenesis (Pacaud et al. 2014; Duforestel et al. 2019).
